# Supplementary material for: Desmoplastic Reaction Associates with Prognosis and Adjuvant Chemotherapy Response in Colorectal Cancer: A Multicenter Retrospective Study
Source: PubMed Central journal article supplement (PMC10269709; doi:10.1158/2767-9764.crc-23-0073), 2023-06-15
Supplement: crc-23-0073-s01.pdf [file crc-23-0073-s01.pdf]

**Supplementary Table S1.** Clinicopathological associations with desmoplastic reaction

|                  | <b>Mature</b> | <b>Middle</b> | <b>Immature</b> | <b>P</b> |
|------------------|---------------|---------------|-----------------|----------|
| <b>Age</b>       | 61.1 ± 12.3   | 61.3 ± 13.3   | 59.9 ± 13.0     | 0.16     |
| <b>Sex</b>       |               |               |                 | 0.83     |
| Male             | 664 (58.9%)   | 374 (57.7%)   | 258 (57.5%)     |          |
| Female           | 464 (41.1%)   | 274 (42.3%)   | 191 (42.5%)     |          |
| <b>T Status</b>  |               |               |                 | <0.01    |
| 1                | 36 (3.2%)     | 5 (0.8%)      | 0 (0.0%)        |          |
| 2                | 191 (16.9%)   | 49 (7.6%)     | 6 (1.3%)        |          |
| 3                | 727 (64.5%)   | 430 (66.4%)   | 271 (60.4%)     |          |
| 4                | 174 (15.4%)   | 164 (25.3%)   | 172 (38.3%)     |          |
| <b>N Status</b>  |               |               |                 | <0.01    |
| 0                | 812 (72.0%)   | 374 (57.7%)   | 215 (47.9%)     |          |
| 1                | 213 (18.9%)   | 178 (27.5%)   | 137 (30.5%)     |          |
| 2                | 103 (9.1%)    | 96 (14.8%)    | 97 (21.6%)      |          |
| <b>TNM Stage</b> |               |               |                 | <0.01    |
| I                | 194 (17.2%)   | 45 (6.9%)     | 4 (0.9%)        |          |
| II               | 615 (54.5%)   | 326 (50.3%)   | 209 (46.5%)     |          |
| III              | 308 (27.3%)   | 258 (39.8%)   | 221 (49.3%)     |          |
| IV               | 11 (1.0%)     | 19 (2.9%)     | 15 (3.3%)       |          |
| <b>Location</b>  |               |               |                 | <0.01    |
| Colon            | 534 (47.3%)   | 358 (55.2%)   | 204 (45.4%)     |          |
| Rectum           | 594 (52.7%)   | 290 (44.8%)   | 245 (54.6%)     |          |
| <b>CEA</b>       |               |               |                 | 0.42     |
| Normal           | 758 (67.2%)   | 390 (60.2%)   | 254 (56.6%)     |          |
| Abnormal         | 316 (28.0%)   | 220 (34.0%)   | 174 (38.8%)     |          |
| NA               | 54 (4.8%)     | 38 (5.9%)     | 21 (4.7%)       |          |
| <b>Grade</b>     |               |               |                 | 0.01     |
| High             | 166 (14.7%)   | 115 (17.7%)   | 78 (17.4%)      |          |
| Low              | 925 (82.0%)   | 518 (79.9%)   | 364 (81.1%)     |          |
| NA               | 37 (3.3%)     | 15 (2.3%)     | 7 (1.6%)        |          |

**Note:** CEA was analyzed based on 2112 available patients and grade was analyzed based on 2166 available patients. Others were analyzed on the basis of whole patients.

**Abbreviations:** TNM, tumor-node-metastasis; CEA, carcinoembryonic antigen; DR, desmoplastic reaction, NA, not available.
