# Supplementary material for: Desmoplastic Reaction Associates with Prognosis and Adjuvant Chemotherapy Response in Colorectal Cancer: A Multicenter Retrospective Study
Source: PubMed Central journal article supplement (PMC10269709; doi:10.1158/2767-9764.crc-23-0073), 2023-06-15
Supplement: crc-23-0073-s02.pdf [file crc-23-0073-s02.pdf]

**Supplementary Table S2.** Interobserver Agreement for DR

|              | <b>Observer 1 vs 2</b> | <b>Observer 2 vs 3</b> | <b>Observer1 vs 3</b> | <b>Light's overall Kappa</b> |
|--------------|------------------------|------------------------|-----------------------|------------------------------|
| <b>Kappa</b> | 0.612                  | 0.658                  | 0.69                  | 0.609                        |

**Abbreviations:** DR, Desmoplastic reaction.
