# Supplementary material for: Desmoplastic Reaction Associates with Prognosis and Adjuvant Chemotherapy Response in Colorectal Cancer: A Multicenter Retrospective Study
Source: PubMed Central journal article supplement (PMC10269709; doi:10.1158/2767-9764.crc-23-0073), 2023-06-15
Supplement: crc-23-0073-s03.pdf [file crc-23-0073-s03.pdf]

**Supplementary Table S3.** Uni- and multivariate analyses of DFS

|                  | Univariate Cox analysis |        | Multivariate Cox analysis |        |
|------------------|-------------------------|--------|---------------------------|--------|
|                  | HR (95%CI)              | P      | HR (95%CI)                | P      |
| <b>Sex</b>       |                         |        |                           |        |
| Male             | 1                       |        |                           |        |
| Female           | 10.93 (0.76-1.12)       | 0.434  | -                         | -      |
| <b>Age</b>       | 1.03 (1.02-1.03)        | <0.001 | 1.03 (1.02-1.04)          | 0.001  |
| <b>Location</b>  |                         |        |                           |        |
| Colon            | 1                       |        | 1                         |        |
| Rectum           | 1.02 (0.84-1.24)        | 0.826  | 1.35(0.95-1.93)           | 0.1    |
| <b>CEA</b>       |                         |        |                           |        |
| Normal           | 1                       |        | 1                         |        |
| Abnormal         | 2.09 (1.71-2.55)        | <0.001 | 1.53 (1.25-1.88)          | <0.001 |
| <b>Grade</b>     |                         |        |                           |        |
| Low              | 1                       |        | 1                         |        |
| High             | 1.74 (1.31-2.31)        | <0.001 | 1.40 (1.04-1.89)          | 0.024  |
| <b>TNM Stage</b> |                         |        |                           |        |
| I                | 1                       |        | 1                         |        |
| II               | 2.23 (1.44-3.44)        | <0.001 | 1.96 (1.22-3.13)          | 0.005  |
| III              | 5.19 (3.41-7.90)        | <0.001 | 3.85 (2.41-6.15)          | <0.001 |
| IV               | 17.40 (10.26-29.5)      | <0.001 | 14.72 (8.11-26.70)        | <0.001 |
| <b>DR</b>        |                         |        |                           |        |
| Mature           | 1                       |        | 1                         |        |
| Middle           | 1.75 (1.39-2.20)        | <0.001 | 1.37 (1.07-1.75)          | 0.013  |
| Immature         | 2.80 (2.21-3.55)        | <0.001 | 2.08 (1.61-2.69)          | <0.001 |

**Note:** DFS were available in 1390 patients. CEA was analyzed based on 1323 available patients. Grade was available in 1346 patients. Others were analyzed on the basis of all patients available of DFS.

**Abbreviations:** HR, hazard ratio; 95%CI, 95% confidence interval; TNM, tumor-node-metastasis; CEA, carcinoembryonic antigen; DR, desmoplastic reaction.
