# Supplementary material for: Desmoplastic Reaction Associates with Prognosis and Adjuvant Chemotherapy Response in Colorectal Cancer: A Multicenter Retrospective Study
Source: PubMed Central journal article supplement (PMC10269709; doi:10.1158/2767-9764.crc-23-0073), 2023-06-15
Supplement: crc-23-0073-s04.pdf [file crc-23-0073-s04.pdf]

**Supplementary Table S4.** Uni- and multivariate analyses in stage II CRC patients

|           | Univariate Cox analysis |        | Multivariate Cox analysis |        |
|-----------|-------------------------|--------|---------------------------|--------|
|           | HR(95%CI)               | P      | HR(95%CI)                 | P      |
| <b>TB</b> |                         |        |                           |        |
| Grade 1   | 1                       |        | 1                         |        |
| Grade 2   | 1.49(1.00–2.22)         | 0.051  | 1.35(0.90–2.02)           | 0.15   |
| Grade 3   | 2.26(1.50–3.39)         | <0.001 | 1.98(1.31–3.00)           | 0.001  |
| <b>DR</b> |                         |        |                           |        |
| Mature    | 1                       |        | 1                         |        |
| Middle    | 1.39(0.98–1.99)         | 0.068  | 1.35(0.95–1.93)           | 0.1    |
| Immature  | 2.23(1.54–3.23)         | <0.001 | 1.98(1.36–2.90)           | <0.001 |

**Note:** This was analyzed based on 872 stage II CRC patients.

**Abbreviations:** HR, hazard ratio; 95%CI, 95% confidence interval; TB, tumor budding; DR, desmoplastic reaction.
