# Supplementary material for: Desmoplastic Reaction Associates with Prognosis and Adjuvant Chemotherapy Response in Colorectal Cancer: A Multicenter Retrospective Study
Source: PubMed Central journal article supplement (PMC10269709; doi:10.1158/2767-9764.crc-23-0073), 2023-06-15
Supplement: crc-23-0073-s05.pdf [file crc-23-0073-s05.pdf]

**Supplementary Table S5.** Correlation between DR and TB.

| DR       | TB         |           |           | P      |
|----------|------------|-----------|-----------|--------|
|          | Grade 1    | Grade 2   | Grade 3   |        |
| Mature   | 506(82.3%) | 75(12.2%) | 34(5.5%)  | <0.001 |
| Middle   | 245(75.2%) | 50(15.3%) | 31(9.5%)  |        |
| Immature | 125(59.8%) | 48(23.0%) | 36(17.2%) |        |

**Note:** This was analyzed based on 1150 stage II CRC.

**Abbreviation:** TB, tumor budding; DR, desmoplastic reaction.
