# Supplementary material for: Desmoplastic Reaction Associates with Prognosis and Adjuvant Chemotherapy Response in Colorectal Cancer: A Multicenter Retrospective Study
Source: PubMed Central journal article supplement (PMC10269709; doi:10.1158/2767-9764.crc-23-0073), 2023-06-15
Supplement: crc-23-0073-s06.pdf [file crc-23-0073-s06.pdf]

**Supplementary Table S6.** Patient clinicopathologic characteristics in ACT and surgery only groups

|                 | <b>Surgery only group<br/>(N = 479)</b> | <b>ACT group<br/>(N = 393)</b> | <b>P</b> |
|-----------------|-----------------------------------------|--------------------------------|----------|
| <b>Age</b>      | 65.6 ± 11.7                             | 56.5 ± 11.7                    | <0.001   |
| <b>Sex</b>      |                                         |                                | 0.216    |
| Male            | 279(58.2%)                              | 246(62.6%)                     |          |
| Female          | 200(41.8%)                              | 147(37.4%)                     |          |
| <b>Location</b> |                                         |                                | 0.924    |
| Colon           | 235(49.1%)                              | 195(49.6%)                     |          |
| Rectum          | 244(50.9%)                              | 198(50.4%)                     |          |
| <b>CEA</b>      |                                         |                                | 0.791    |
| Normal          | 312(65.1%)                              | 258(65.6%)                     |          |
| Abnormal        | 132(27.6%)                              | 115(29.3%)                     |          |
| NA              | 35(7.3%)                                | 20 (5.1%)                      |          |
| <b>Grade</b>    |                                         |                                | 0.084    |
| High            | 58(12.1%)                               | 64(16.3%)                      |          |
| Low             | 413(86.2%)                              | 319(81.2%)                     |          |
| NA              | 8(1.7%)                                 | 10(2.5%)                       |          |
| <b>DR</b>       |                                         |                                | 0.343    |
| Mature          | 250(52.2%)                              | 190(48.3%)                     |          |
| Middle          | 132(27.6%)                              | 108(27.5%)                     |          |
| Immature        | 97(20.3%)                               | 95(24.2%)                      |          |

**Note:** CEA was available in 817 patients and grade was available in 854 patients. Others were available in all 872 patients with treatment information.

**Abbreviation:** CEA, carcinoembryonic antigen; DR, desmoplastic reaction; NA, not available.
