# Supplementary material for: Desmoplastic Reaction Associates with Prognosis and Adjuvant Chemotherapy Response in Colorectal Cancer: A Multicenter Retrospective Study
Source: PubMed Central journal article supplement (PMC10269709; doi:10.1158/2767-9764.crc-23-0073), 2023-06-15
Supplement: crc-23-0073-s07.pdf [file crc-23-0073-s07.pdf]

**Supplementary Table S7.** Multivariate analyses in stage II CRC patients

|                  | <b>HR(95%CI)</b> | <b>P</b> |
|------------------|------------------|----------|
| <b>Treatment</b> |                  |          |
| Surgery only     | 1                |          |
| ACT              | 0.71(0.49–1.03)  | 0.074    |
| <b>DR</b>        |                  |          |
| Mature           | 1                |          |
| Middle           | 1.05(0.49–2.25)  | 0.9      |
| Immature         | 2.12(1.09–4.12)  | 0.026    |

**Note:** This was analyzed based on 872 stage II CRC patients with treatment information.

**Abbreviation:** HR, hazard ratio; 95%CI, 95% confidence interval; ACT, adjuvant chemotherapy; DR, desmoplastic reaction.
