# Supplementary material for: Desmoplastic Reaction Associates with Prognosis and Adjuvant Chemotherapy Response in Colorectal Cancer: A Multicenter Retrospective Study
Source: PubMed Central journal article supplement (PMC10269709; doi:10.1158/2767-9764.crc-23-0073), 2023-06-15
Supplement: crc-23-0073-s08.pdf [file crc-23-0073-s08.pdf]

**Supplementary Table S8.** Correlation between DR and Stroma AReactive Invasion Front Areas.

| DR       | SARIFA     |           | P      |
|----------|------------|-----------|--------|
|          | Negative   | Positive  |        |
| Mature   | 291(95.7%) | 13(4.3%)  | <0.001 |
| Middle   | 187(79.6%) | 48(20.4%) |        |
| Immature | 25(30.9%)  | 56(69.1%) |        |

**Note:** This was analyzed based on 620 patients available for SARIFA status.

**Abbreviation:** SARIFA, Stroma AReactive Invasion Front Areas; DR, desmoplastic reaction.
