# Supplementary material for: Desmoplastic Reaction Associates with Prognosis and Adjuvant Chemotherapy Response in Colorectal Cancer: A Multicenter Retrospective Study
Source: PubMed Central journal article supplement (PMC10269709; doi:10.1158/2767-9764.crc-23-0073), 2023-06-15
Supplement: crc-23-0073-s09.pdf [file crc-23-0073-s09.pdf]

**Supplementary Table S9.** The discrimination performance in the two cohorts.

|                  | <b>Discovery cohort</b> | <b>Validation cohort</b> |
|------------------|-------------------------|--------------------------|
|                  | C-index (95% CI)        | C-index (95% CI)         |
| <b>Age</b>       | 0.610 (0.574–0.646)     | 0.571 (0.534–0.608)      |
| <b>TNM stage</b> | 0.652 (0.622–0.681)     | 0.694 (0.663–0.724)      |
| <b>CEA</b>       | 0.626 (0.596–0.657)     | 0.553 (0.521–0.584)      |
| <b>Grade</b>     | 0.536 (0.513–0.558)     | 0.548 (0.518–0.578)      |
| <b>DR</b>        | 0.596 (0.564–0.628)     | 0.644 (0.612–0.677)      |
| <b>Model</b>     | 0.736 (0.706–0.765)     | 0.729 (0.698–0.760)      |

**Note:** C-index of CEA was calculated based on 2112 available patients and C-index of Grade was calculated based on 2165 available patients. Others were calculated on the basis of whole patients.

**Abbreviations:** C-index, Harrell's concordance index; CI, confidence interval; TNM, tumor-node-metastasis; CEA; DR, desmoplastic reaction.
