# Supplementary material for: Desmoplastic Reaction Associates with Prognosis and Adjuvant Chemotherapy Response in Colorectal Cancer: A Multicenter Retrospective Study
Source: PubMed Central journal article supplement (PMC10269709; doi:10.1158/2767-9764.crc-23-0073), 2023-06-15
Supplement: crc-23-0073-s10.pdf [file crc-23-0073-s10.pdf]

**A**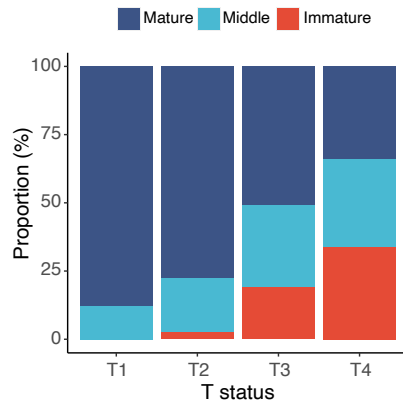**B**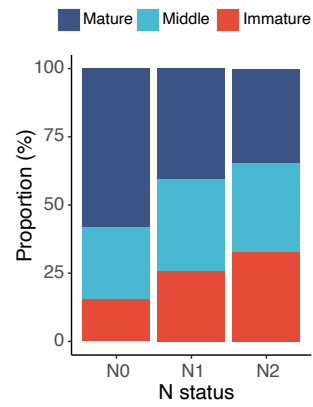

**Supplementary Figure S1. Correlation between DR and T status, N status.** (A) The proportion of each DR types in different T status. (B) The proportion of each DR types in different N statuses.
