# Supplementary material for: Desmoplastic Reaction Associates with Prognosis and Adjuvant Chemotherapy Response in Colorectal Cancer: A Multicenter Retrospective Study
Source: PubMed Central journal article supplement (PMC10269709; doi:10.1158/2767-9764.crc-23-0073), 2023-06-15
Supplement: crc-23-0073-s11.pdf [file crc-23-0073-s11.pdf]

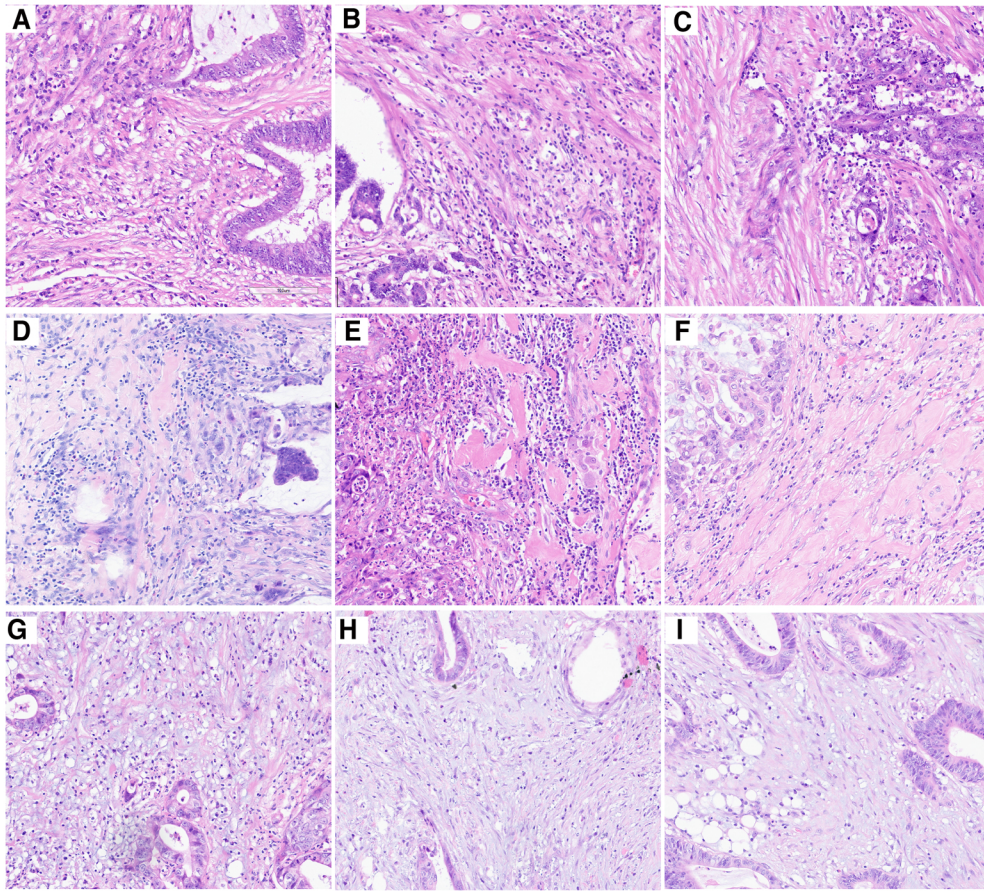

**Supplementary Figure S2. Histological features of the desmoplastic reaction.** (A-C) Fibrotic stroma without myxoid stroma and keloid-like collagen, typically characterized by fine fibers stratified into multilayers (mature type). (D-F) Fibrotic stroma containing keloid-like collagen, i.e., broad bands of collagen with bright eosinophilic hyalinization, similar to those observed in a keloid (middle type). (G-I) Abundant extracellular matrix substance accumulated at the leading edge of the tumor to form myxoid stroma (immature type).
