# Supplementary material for: Desmoplastic Reaction Associates with Prognosis and Adjuvant Chemotherapy Response in Colorectal Cancer: A Multicenter Retrospective Study
Source: PubMed Central journal article supplement (PMC10269709; doi:10.1158/2767-9764.crc-23-0073), 2023-06-15
Supplement: crc-23-0073-s12.pdf [file crc-23-0073-s12.pdf]

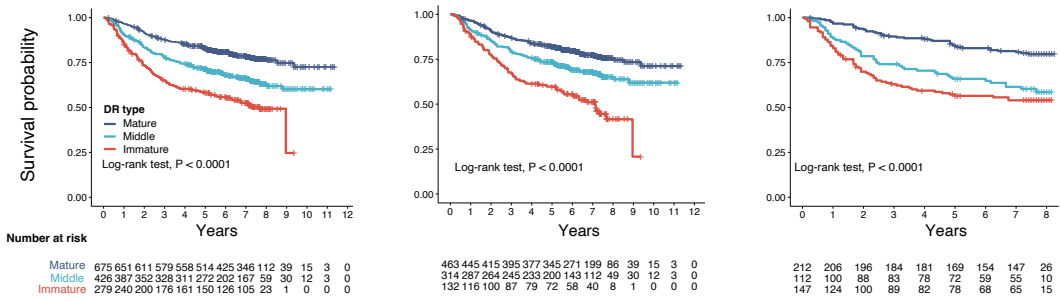

**Supplementary Figure S3. Correlation between DR and DFS: (A) Whole cohort. (B) Primary cohort. (C) Validation cohort.**
