# Supplementary material for: Desmoplastic Reaction Associates with Prognosis and Adjuvant Chemotherapy Response in Colorectal Cancer: A Multicenter Retrospective Study
Source: PubMed Central journal article supplement (PMC10269709; doi:10.1158/2767-9764.crc-23-0073), 2023-06-15
Supplement: crc-23-0073-s13.pdf [file crc-23-0073-s13.pdf]

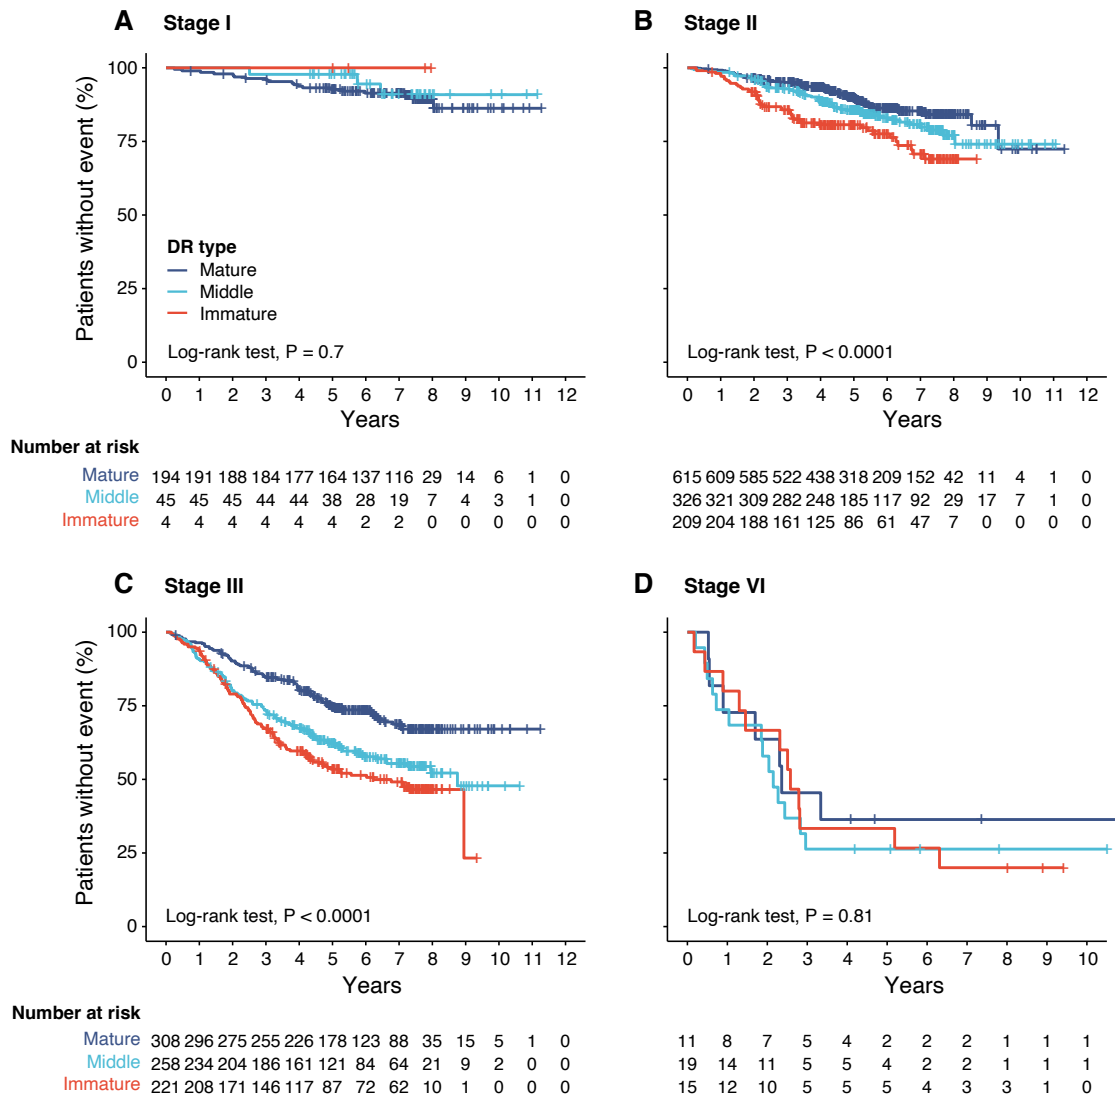

**Supplementary Figure S4. Prognostic significance of DR categorization in each TNM stages of CRC patients.** (A) stage I. (B) stage II. (C) stage III. (D) stage IV. Mature DR was associated with longer OS in stage II, and III CRC patients (both  $P < 0.0001$ , log-rank test). CRC, colorectal cancer; TNM, tumor-node-metastasis; DR, desmoplastic reaction.
