# Supplementary material for: Desmoplastic Reaction Associates with Prognosis and Adjuvant Chemotherapy Response in Colorectal Cancer: A Multicenter Retrospective Study
Source: PubMed Central journal article supplement (PMC10269709; doi:10.1158/2767-9764.crc-23-0073), 2023-06-15
Supplement: crc-23-0073-s14.pdf [file crc-23-0073-s14.pdf]

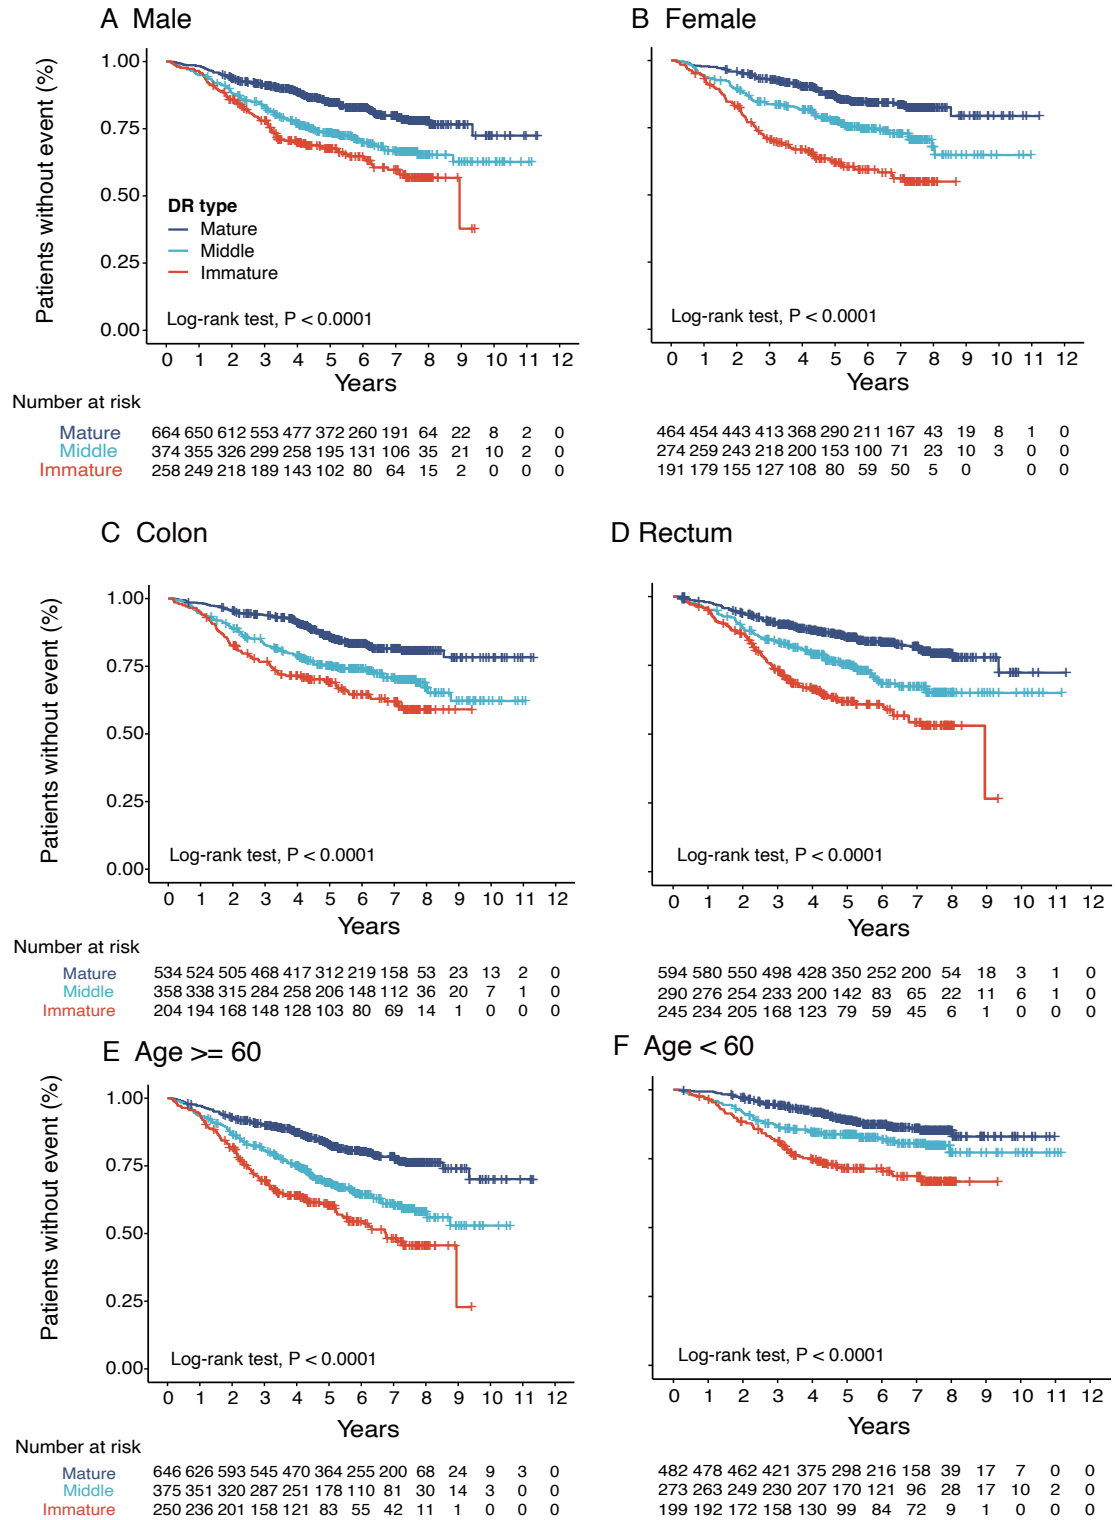

**Supplementary Figure S5. Prognostic significance of DR categorization in different subgroups of CRC patients.** (A–B) sex. (C–D) location of tumor. (E–F) age (all  $P < 0.0001$ , log-rank test). DR, Desmoplastic reaction.
