# Supplementary material for: Desmoplastic Reaction Associates with Prognosis and Adjuvant Chemotherapy Response in Colorectal Cancer: A Multicenter Retrospective Study
Source: PubMed Central journal article supplement (PMC10269709; doi:10.1158/2767-9764.crc-23-0073), 2023-06-15
Supplement: crc-23-0073-s15.pdf [file crc-23-0073-s15.pdf]

**A BRAF0**

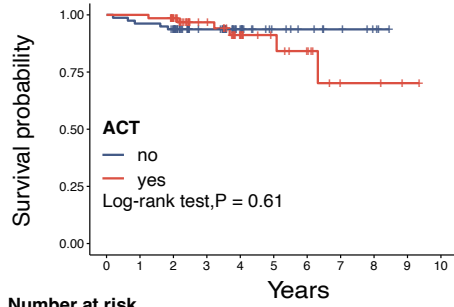

Number at risk

|         |    |    |    |    |    |    |   |   |   |   |   |
|---------|----|----|----|----|----|----|---|---|---|---|---|
| ACT=no  | 79 | 76 | 71 | 44 | 25 | 12 | 9 | 6 | 3 | 0 | 0 |
| ACT=yes | 68 | 68 | 60 | 38 | 24 | 13 | 9 | 3 | 3 | 1 | 0 |

**B BRAF1**

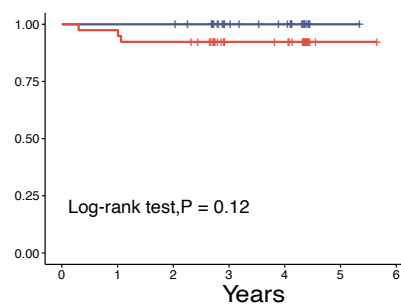

|         |    |    |    |    |    |   |   |
|---------|----|----|----|----|----|---|---|
| ACT=no  | 30 | 30 | 30 | 18 | 14 | 1 | 0 |
| ACT=yes | 39 | 38 | 36 | 21 | 20 | 1 | 0 |

**C PNI0**

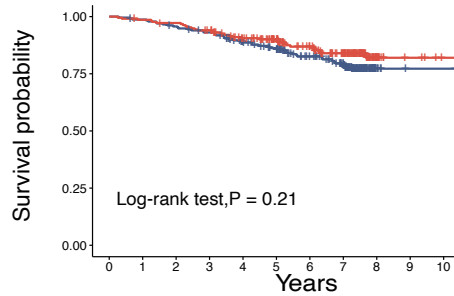

Number at risk

|         |     |     |     |     |     |     |     |     |    |   |   |
|---------|-----|-----|-----|-----|-----|-----|-----|-----|----|---|---|
| ACT=no  | 233 | 229 | 221 | 213 | 190 | 176 | 143 | 122 | 6  | 1 | 1 |
| ACT=yes | 216 | 212 | 208 | 199 | 179 | 155 | 126 | 99  | 17 | 6 | 2 |

**D PNI1**

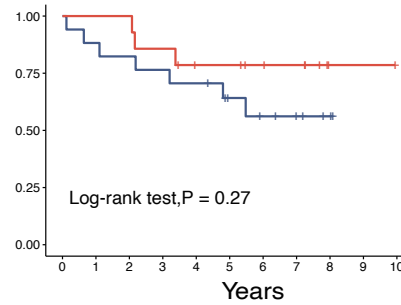

|         |    |    |    |    |    |   |   |   |   |   |   |
|---------|----|----|----|----|----|---|---|---|---|---|---|
| ACT=no  | 17 | 15 | 14 | 13 | 12 | 8 | 6 | 4 | 2 | 0 | 0 |
| ACT=yes | 14 | 14 | 14 | 12 | 9  | 9 | 7 | 6 | 1 | 1 | 0 |

**E LVI0**

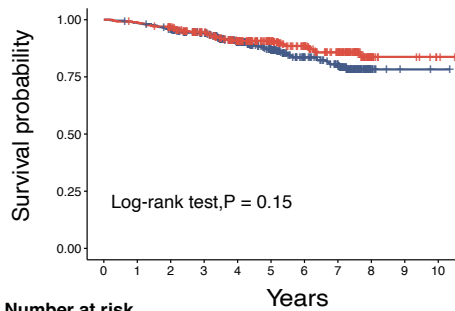

Number at risk

|         |     |     |     |     |     |     |     |     |    |   |   |
|---------|-----|-----|-----|-----|-----|-----|-----|-----|----|---|---|
| ACT=no  | 464 | 457 | 438 | 387 | 297 | 220 | 151 | 126 | 10 | 2 | 1 |
| ACT=yes | 368 | 363 | 347 | 298 | 250 | 180 | 131 | 102 | 18 | 8 | 3 |

**F LVI1**

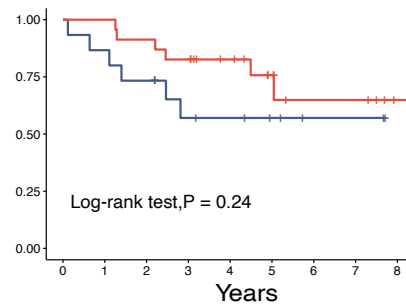

|         |    |    |    |    |    |   |   |   |   |
|---------|----|----|----|----|----|---|---|---|---|
| ACT=no  | 15 | 13 | 11 | 7  | 6  | 4 | 2 | 2 | 0 |
| ACT=yes | 23 | 23 | 21 | 19 | 14 | 9 | 5 | 5 | 1 |

**Supplementary Figure S6. Predictive significance of other clinical risk factors on the ACT of stage II CRC. (A–B) BRAF status. (C–D) PNI. (E–F) LVI. ACT, adjuvant chemotherapy. PNI, peripheral nerve invasion. LVI, lymphatic/vascular invasion.**
