# Supplementary material for: Desmoplastic Reaction Associates with Prognosis and Adjuvant Chemotherapy Response in Colorectal Cancer: A Multicenter Retrospective Study
Source: PubMed Central journal article supplement (PMC10269709; doi:10.1158/2767-9764.crc-23-0073), 2023-06-15
Supplement: crc-23-0073-s16.pdf [file crc-23-0073-s16.pdf]

**A Grade 1**

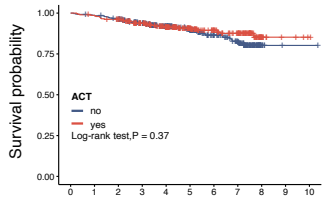

**Number at risk**

|         |     |     |     |     |     |     |     |     |    |   |   |
|---------|-----|-----|-----|-----|-----|-----|-----|-----|----|---|---|
| ACT=no  | 373 | 367 | 355 | 309 | 242 | 184 | 125 | 103 | 7  | 1 | 1 |
| ACT=yes | 290 | 285 | 274 | 236 | 195 | 139 | 100 | 80  | 12 | 4 | 1 |

**B Grade 2**

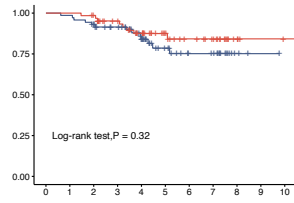

|    |    |    |    |    |    |    |    |   |   |   |
|----|----|----|----|----|----|----|----|---|---|---|
| 71 | 70 | 64 | 57 | 41 | 25 | 16 | 15 | 3 | 1 | 0 |
| 64 | 64 | 61 | 51 | 40 | 28 | 21 | 17 | 5 | 2 | 1 |

**C Grade 3**

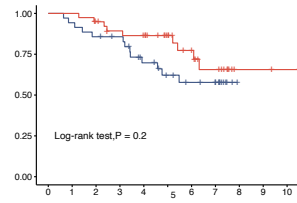

|    |    |    |    |    |    |    |    |   |   |   |
|----|----|----|----|----|----|----|----|---|---|---|
| 35 | 33 | 30 | 28 | 20 | 15 | 12 | 10 | 0 | 0 | 0 |
| 39 | 39 | 35 | 31 | 29 | 22 | 15 | 10 | 2 | 2 | 1 |

**Supplementary Figure S7. Predictive significance of other TB on the ACT of stage II CRC. (A) Grade 1. (B) Grade 2. (C) Grade 3. ACT, adjuvant chemotherapy. TB, tumor budding.**
