# Supplementary material for: Desmoplastic Reaction Associates with Prognosis and Adjuvant Chemotherapy Response in Colorectal Cancer: A Multicenter Retrospective Study
Source: PubMed Central journal article supplement (PMC10269709; doi:10.1158/2767-9764.crc-23-0073), 2023-06-15
Supplement: crc-23-0073-s17.pdf [file crc-23-0073-s17.pdf]

### A MSI

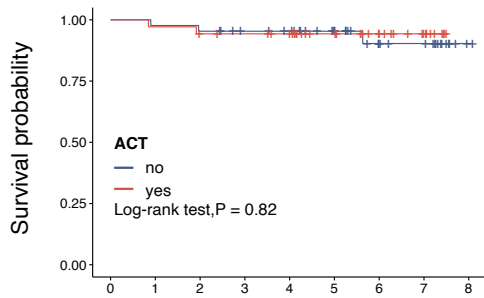

#### Number at risk

|         |    |    |    |    |    |    |    |    |   |
|---------|----|----|----|----|----|----|----|----|---|
| ACT=no  | 43 | 42 | 41 | 37 | 35 | 25 | 15 | 13 | 1 |
| ACT=yes | 35 | 34 | 32 | 31 | 28 | 21 | 14 | 8  | 0 |

### B MSS

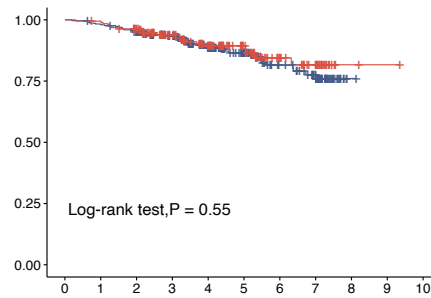

|         |     |     |     |     |     |     |    |    |   |   |   |
|---------|-----|-----|-----|-----|-----|-----|----|----|---|---|---|
| ACT=no  | 296 | 290 | 276 | 231 | 160 | 104 | 67 | 52 | 1 | 0 | 0 |
| ACT=yes | 191 | 189 | 176 | 133 | 103 | 58  | 33 | 22 | 2 | 1 | 0 |

### Supplementary Figure S8. Predictive significance of other MSI status on the ACT of stage II CRC.

(A) MSI. (B) MSS. ACT, adjuvant chemotherapy. MSI, microsatellite instability; MSS, microsatellite stability.
