# Supplementary material for: Desmoplastic Reaction Associates with Prognosis and Adjuvant Chemotherapy Response in Colorectal Cancer: A Multicenter Retrospective Study
Source: PubMed Central journal article supplement (PMC10269709; doi:10.1158/2767-9764.crc-23-0073), 2023-06-15
Supplement: crc-23-0073-s18.pdf [file crc-23-0073-s18.pdf]

### A Nomogram for OS

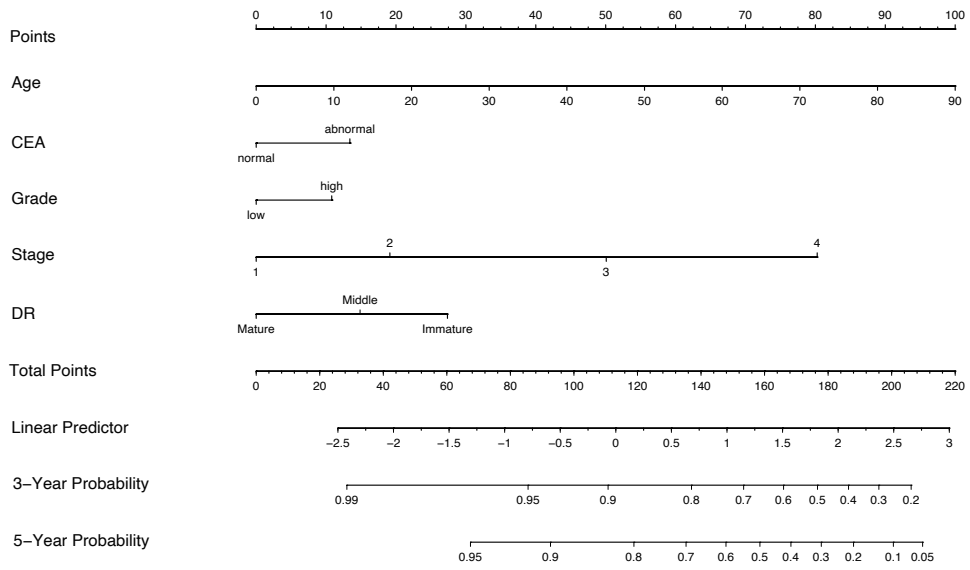

### B Primary cohort

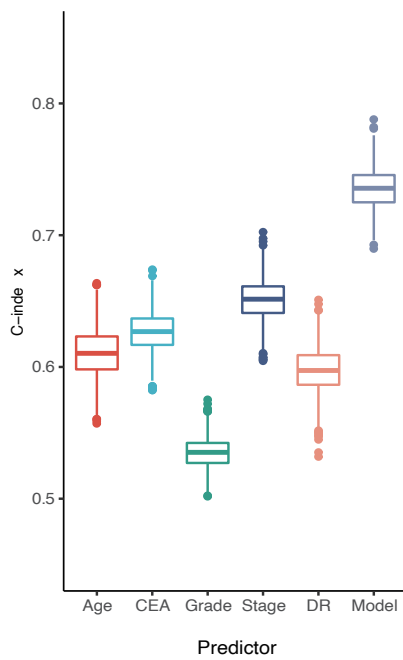

### C Validation cohort

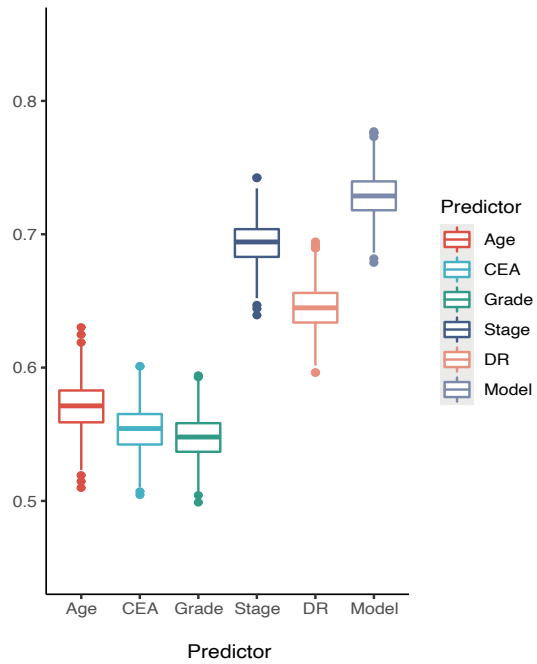

**Supplementary Figure S9. Nomogram for OS and boxplots of C-indices in primary and validation cohorts.** (A) Nomogram for OS. (B) Boxplots of C-indices in primary cohort. (C) Boxplots of C-indices in validation cohort. DR, desmoplastic reaction; OS, overall survival; CEA, carcinoembryonic antigen.
